# Supplementary material for: Distinct stages of synapse elimination are induced by burst firing of CA1 neurons and differentially require MEF2A/D
Source: eLife journal article supplement (doi:10.7554/elife.26278), 2017-09-13
Supplement: supp [file elife_poa_e26278_Transparent_Reporting_File.docx]

***eLife’s* transparent reporting form**

We encourage authors to provide detailed information *within their submission* to facilitate the interpretation and replication of experiments. If you have any questions, please contact us: [editorial@elifesciences.org](mailto:editorial@elifesciences.org).

**Sample-size estimation**

- You should state whether an appropriate sample size was computed when the study was being designed
- You should state the statistical method of sample size computation and any required assumptions
- If no explicit power analysis was used, you should describe how you decided what sample (replicate) size (number) to use

Please outline where this information can be found within the submission (e.g., page numbers or figure legends), or explain why this information doesn’t apply to your submission:

The sample size and statistical methods for each experiment are indicated in respective figure legends and supplementary figure legends (text p31-37) and tables (inside supplementary materials)

Details of statistical methods are described in materials and methods section (main text p25).

**Replicates**

- You should report how often each experiment was performed
- You should include a definition of biological versus technical replication
- The data obtained should be provided and sufficient information should be provided to indicate the number of independent biological and/or technical replicates
- If you encountered any outliers, you should describe how these were handled
- Criteria for exclusion/inclusion of data should be clearly stated
- High-throughput sequence data should be uploaded before submission, with a private link for reviewers provided (these are available from both GEO and ArrayExpress)

Please outline where this information can be found within the submission (e.g., page numbers or figure legends), or explain why this information doesn’t apply to your submission:

Criteria for data inclusion into analysis for electrophysiological experiments are described in materials and methods section (main text p21-22).

qPCR experiments were done with triplicate for each condition. If the standard deviation of the Ct reading for a triplicate is greater than 0.3, only the two closest values within the triplicate would be included for analysis.

**Statistical reporting**

- Statistical analysis methods should be described and justified
- Raw data should be presented in figures whenever informative to do so (typically when N per group is less than 10)
- For each experiment, you should identify the statistical tests used, exact values of N, definitions of center, methods of multiple test correction, and dispersion and precision measures (e.g., mean, median, SD, SEM, confidence intervals; and, for the major substantive results, a measure of effect size (e.g., Pearson's r, Cohen's d)
- Report exact p-values wherever possible alongside the summary statistics and 95% confidence intervals. These should be reported for all key questions and not only when the p-value is less than 0.05.

Statistical methods and results for each experimental group are described in respective figure legends and supplementary figure legends (main text p31-37), and details for statistics are described in materials and methods section (main text p25).

Raw data for electrophysiological studies are presented as tables in supplementary tables.

Please outline where this information can be found within the submission (e.g., page numbers or figure legends), or explain why this information doesn’t apply to your submission:

(For large datasets, or papers with a very large number of statistical tests, you may upload a single table file with tests, Ns, etc., with reference to page numbers in the manuscript.)

**Additional data files (“source data”)**

- We encourage you to upload relevant additional data files, such as numerical data that are represented as a graph in a figure, or as a summary table
- Where provided, these should be in the most useful format, and they can be uploaded as “Source data” files linked to a main figure or table
- Include model definition files including the full list of parameters used
- Include code used for data analysis (e.g., R, MatLab)
- Avoid stating that data files are “available upon request”

Please indicate the figures or tables for which source data files have been provided:

Raw data for electrophysiological studies are presented as tables in supplementary tables.

Representative images for imaging experiments are included inside respective figure panels.

Raw traces for electrophysiological recordings are included inside respective figure panels (eEPSCs and mEPSCs for figure 1 and 4 and eEPSCs for others).
