# Supplementary figures and images for: Distinct stages of synapse elimination are induced by burst firing of CA1 neurons and differentially require MEF2A/D
Source: eLife journal article supplement (doi:10.7554/elife.26278), 2017-09-13

Figure 6-figure supplement 2

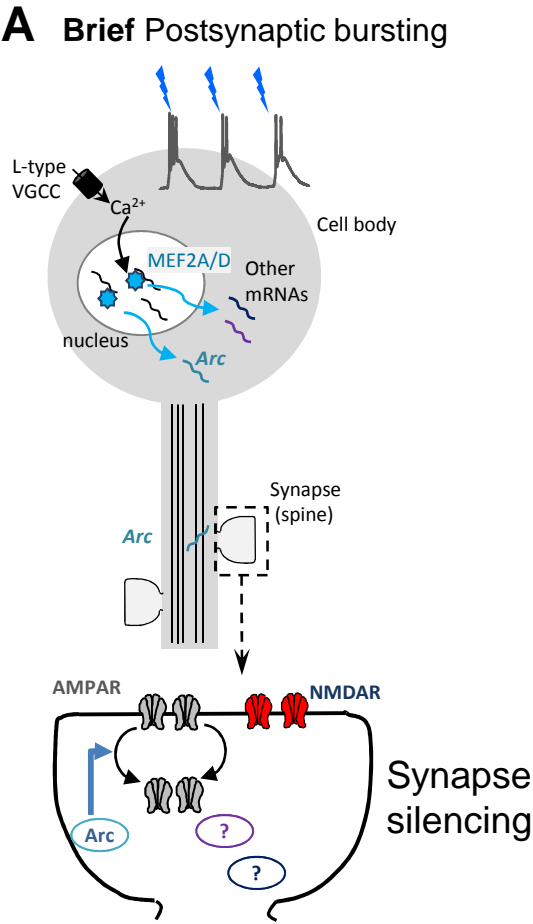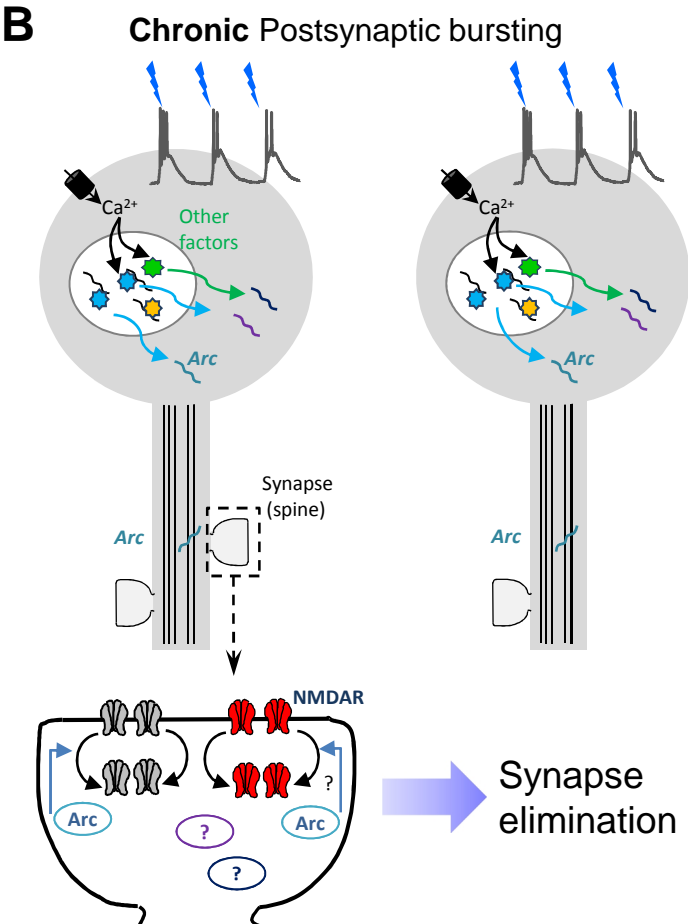

Supplement: supp [file elife-26278-supp-v1.zip]

Figure 5-figure supplement 1

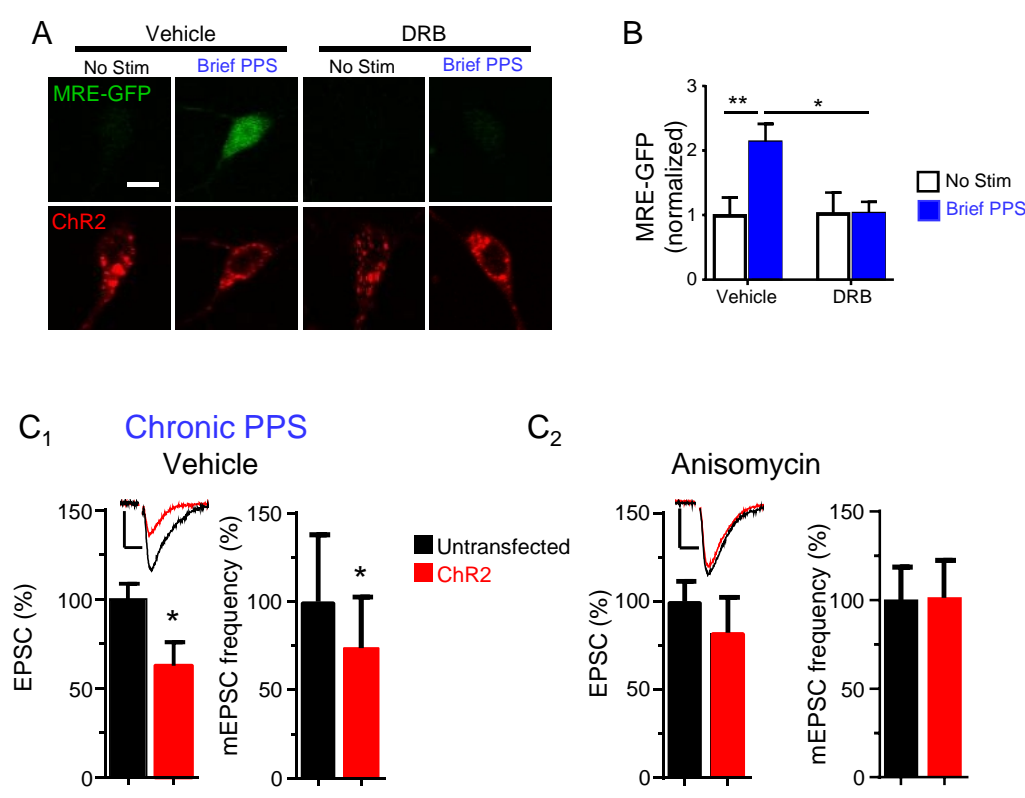

Supplement: supp [file elife-26278-supp-v1.zip]

Figure 2-figure supplement 1

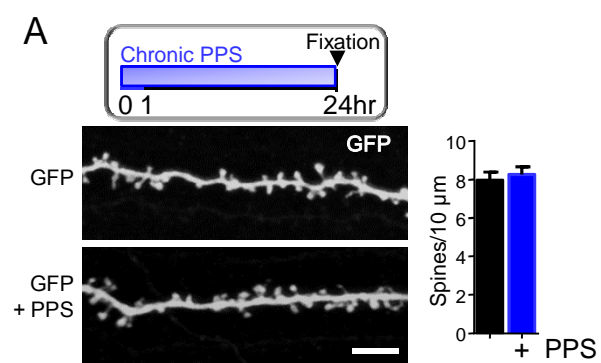

Supplement: supp [file elife-26278-supp-v1.zip]

Figure 1-figure supplement 1

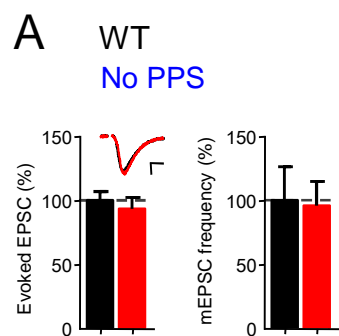

Supplement: supp [file elife-26278-supp-v1.zip]

Figure 3-figure supplement 1

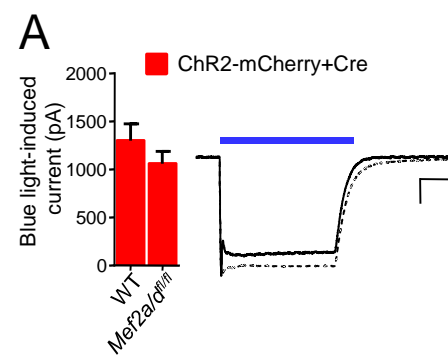

Supplement: supp [file elife-26278-supp-v1.zip]

Figure 6-figure supplement 1

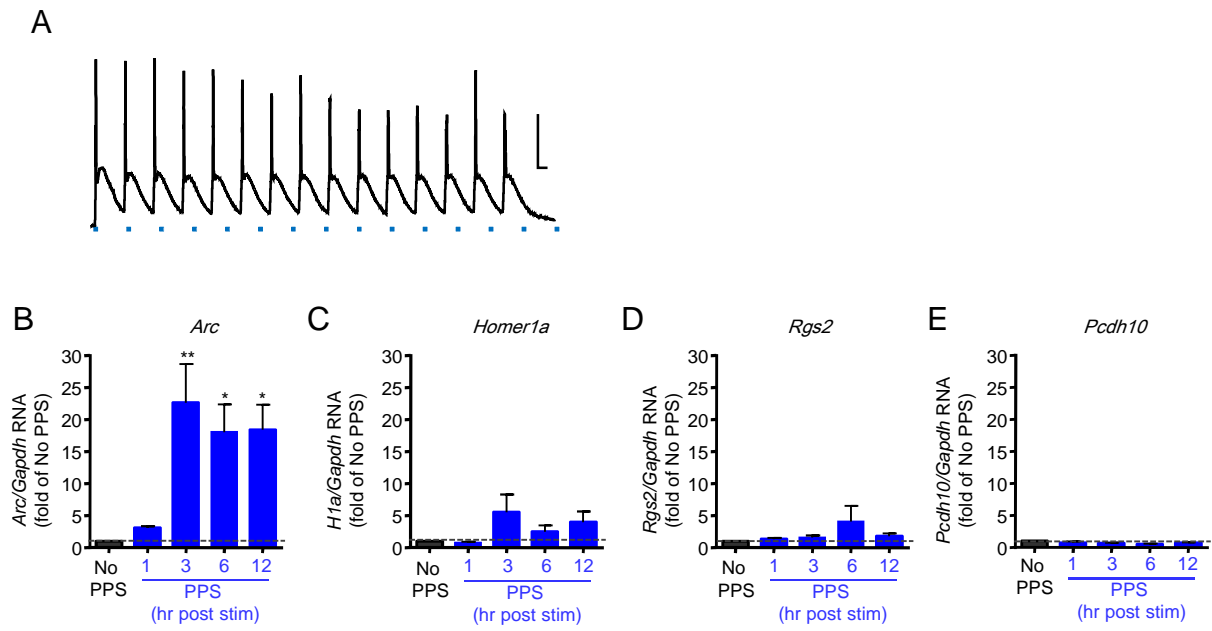

Supplement: supp [file elife-26278-supp-v1.zip]

Figure 4-figure supplement 1

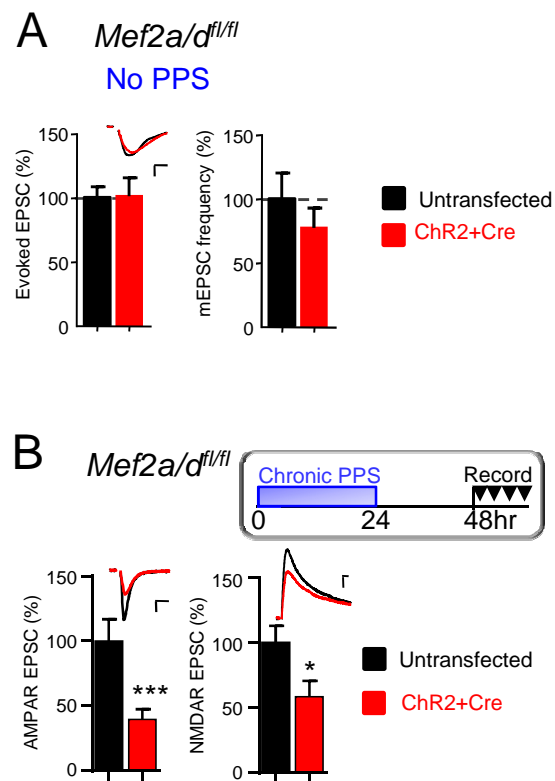

Supplement: supp [file elife-26278-supp-v1.zip]
